# Supplementary material for: PknG senses amino acid availability to control metabolism and virulence of Mycobacterium tuberculosis
Source: PLoS Pathog. 2017 May 17;13(5):e1006399. doi: 10.1371/journal.ppat.1006399 (PMC5448819; doi:10.1371/journal.ppat.1006399)
Supplement: S7 Table — (XLSX) [file ppat.1006399.s007.xlsx]

## Sheet: metabolite_fc_and_pvalues_PknG_
Ion MZ	KEGG ID	Annotation	Fold change in pknG-disrupted M. bovis BCG compared to parental	adjusted p-value
145.014	akg	2-Oxoglutarate	0.22388	1e-05
681.911	gdptp	Guanosine 3'-diphosphate 5'-triphosphate	0.283361	0.021946
766.108	coa	Coenzyme A	0.521034	0.011063
182.97	3php	3-Phosphohydroxypyruvate	0.554455	9.1e-05
914.506	prepphthACP	phenolic phthiocerol precursor bound ACP	0.559207	4e-06
909.639	decda_tb;decdr_tb	decaprenylphosphoryl-beta-D-arabinofuranose;decaprenylphosphoryl-beta-D-5-ribose	0.576692	0.006878
346.056	amp;dgmp	AMP;dGMP	0.593459	1e-06
892.211	occoa	Octanoyl-CoA (n-C8:0CoA)	0.596538	1e-06
166.975	pep	Phosphoenolpyruvate	0.599194	6e-06
812.483	fmcbtt	Iron(II) mycobactin T	0.602876	0.027055
117.019	succ	Succinate	0.62604	0.31237
260.993	h2mb4p	1-hydroxy-2-methyl-2-(E)-butenyl 4-diphosphate	0.627512	0.02523
101.025	2mop;2obut;acac;sucsal	2-Methyl-3-oxopropanoate;2-Oxobutanoate;Acetoacetate;Succinic semialdehyde	0.635692	1e-06
481.465	phthdl	phthiodolone	0.666867	0.016741
154.975	2pglyc	2-Phosphoglycolate	0.668642	0.319666
437.436	tmhexc	tri-methyl hexacosanoate	0.683682	0.29356
191.02	cit;icit	Citrate;Isocitrate	0.686951	0.013288
989.605	decdpa_tb;decdpr_tb	decaprenylphosphoryl-beta-D-5-phosphoarabinofuranose;decaprenylphosphoryl-beta-D-5-phosphoribose	0.703504	0.004519
721.45	octdp	all-trans-Octaprenyl diphosphate	0.704745	0.044431
353.343	mbhn	methyl behenic acid	0.711717	0.312172
465.467	pmhexc	penta-methyl hexacosanoate	0.720902	0.337534
423.421	tamlgnc	tri-methyl lignoceric acid	0.726972	0.123646
814.499	mcbtt	mycobactin T	0.731474	0.127356
410.027	dadp	dADP	0.733221	6e-06
381.374	tmbhn	tri-methyl behenic acid	0.740095	0.338984
409.405	tmlgnc	tri-methyl lignoceric acid	0.746371	0.373562
421.075	tre6p	alpha,alpha'-Trehalose 6-phosphate	0.749551	0.001078
579.428	mqn6	Menaquinone 6	0.750595	0.707223
157.025	dhor-S	(S)-Dihydroorotate	0.751974	0.000946
493.499	pmocta	penta-methyl octacosanoate	0.753582	0.376455
179.034	34hpp	3-(4-Hydroxyphenyl)pyruvate	0.755739	0.005423
489.992	datp	dATP	0.756406	7e-06
386.016	dcdp	dCDP	0.756651	0.00052
175.061	3c2hmp;3c3hmp	3-Carboxy-2-hydroxy-4-methylpentanoate;3-Carboxy-3-hydroxy-4-methylpentanoate	0.763043	0.033673
565.412	2dmmq6	2-Demethylmenaquinone 6	0.766883	0.310973
426.022	adp;dgdp;pap	ADP;dGDP;Adenosine 3',5'-bisphosphate	0.76719	0.000513
939.648	decdman1p_tb	(E,E,E,E,E,E,E,Z,Z) decaprenyl mannose phosphate	0.768205	0.267785
157.051	2ippm	2-Isopropylmaleate	0.772743	0.004288
363.036	xmp	Xanthosine 5'-phosphate	0.775668	2.8e-05
306.049	dcmp	dCMP	0.784244	0.004822
73.0294	lald-L;ppa	L-Lactaldehyde;Propionate (n-C3:0)	0.785422	0.269767
215.033	2me4p	2-C-methyl-D-erythritol 4-phosphate	0.786138	0.234195
577.593	hpmdtria	hepta-methyl dotriacontanoic acid (7 methyl branches)	0.793221	0.429627
401.017	dtdp	dTDP	0.795175	0.153418
355.065	5aprbu	5-Amino-6-(5'-phosphoribitylamino)uracil	0.796181	0.00521
246.063	sucglu	N2-Succinyl-L-glutamate	0.796317	0.001845
116.035	aspsa	L-Aspartate 4-semialdehyde	0.801764	0.088706
507.514	hmocta	hexa-methyl octacosanoate	0.805622	0.304322
184.986	2pg;3pg	D-Glycerate 2-phosphate;3-Phospho-D-glycerate	0.809924	0.011135
777.595	decd_tb	(E,E,E,E,E,E,E,Z,Z) decaprenyl phosphate	0.811242	0.431583
549.562	hpmtria	hepta-methyl triacontanoic acid (C30:0, plus 7 methyl branches)	0.813033	0.496402
60.0442	etha	Ethanolamine	0.814186	0.29416
451.452	tamhexc	tetra-methyl hexacosanoate	0.823544	0.313211
907.338	pre4	Precorrin 4	0.825213	0.033221
362.051	gmp	GMP	0.826131	0.052087
701.536	2dmmq8	2-Demethylmenaquinone 8	0.827002	0.63175
325.311	marach	methyl arachidic acid	0.830048	0.522304
96.9689	pi	Phosphate	0.830437	0.236301
199.004	e4p	D-Erythrose 4-phosphate	0.835924	0.048999
266.088	adn;dgsn	Adenosine;Deoxyguanosine	0.839145	0.001732
161.046	glycogen	glycogen	0.840634	0.036885
558.064	prbamp	1-(5-Phosphoribosyl)-AMP	0.842007	0.08827
186.114	8aonn	8-Amino-7-oxononanoate	0.846241	0.008473
143.108	octa	octanoate (n-C8:0)	0.849755	0.33682
243.033	fc1p	L-Fuculose 1-phosphate	0.853394	0.064942
421.067	tres	trehalose 2 sulfate	0.85378	0.00019
129.055	3mop;4mop	(S)-3-Methyl-2-oxopentanoate;4-Methyl-2-oxopentanoate	0.855932	0.000126
322.045	cmp	CMP	0.856397	0.006617
188.056	acglu	N-Acetyl-L-glutamate	0.85784	0.085075
225.089	ppbng	Porphobilinogen	0.85983	0.011815
531.443	pphthdl	phenolic phthiodiolone	0.861659	0.639595
163.04	phpyr	Phenylpyruvate	0.863613	0.041813
298.07	4ppan	D-4'-Phosphopantothenate	0.864759	0.005421
611.142	gthox	Oxidized glutathione	0.864886	0.030702
213.016	2dr1p;2dr5p;dxyl5p	2-Deoxy-D-ribose 1-phosphate;2-Deoxy-D-ribose 5-phosphate;1-deoxy-D-xylulose 5-phosphate	0.865118	0.043246
91.04	glyc	Glycerol	0.867994	0.57767
135.045	pac	Phenylacetic acid	0.87064	0.002092
465.98	dctp	dCTP	0.873048	0.01938
115.04	3mob	3-Methyl-2-oxobutanoate	0.873512	0.062415
790.554	ps180	phosphatidylserine (dioctadecanoyl, n-C18:0)	0.873855	0.629614
204.053	lpam	Lipoamide	0.875252	0.178301
535.546	hmtria	hexa-methyl triacontanoic acid (C30:0, plus 6 methyl branches)	0.877948	0.49825
138.067	4ahmmp	4-Amino-5-hydroxymethyl-2-methylpyrimidine	0.878541	0.153746
976.297	tdcoa	Tetradecanoyl-CoA (n-C14:0CoA)	0.878889	0.202797
451.289	1msg3p	1-Acyl-sn-glycerol 3-phosphate (branched C19:0)	0.879422	0.262908
224.056	4adcho	4-amino-4-deoxychorismate	0.883884	0.003202
149.009	tartr-L	L-tartrate	0.88473	0.010666
402.995	udp	UDP	0.884969	0.02452
485.145	msh	mycothiol (reduced)	0.885417	0.09407
189.04	3dhq	3-Dehydroquinate	0.886667	0.06284
576.077	prfp;prlp	1-(5-Phosphoribosyl)-5-[(5-phosphoribosylamino)methylideneamino]imidazole-4-carboxamide;5-[(5-phospho-1-deoxyribulos-1-ylamino)methylideneamino]-1-(5-phosphoribosyl)imidazole-4-carboxamide	0.887873	0.001193
168.066	pydxn	Pyridoxine	0.889015	0.3101
312.059	fpram	2-(Formamido)-N1-(5-phospho-D-ribosyl)acetamidine	0.889053	0.005826
843.521	pgp160190	Phosphatidylglycerophosphate (hexadecanoyl, tuberculostearoyl, C16:0, C19:0)	0.889309	0.467198
567.295	pppg9	Protoporphyrinogen IX	0.890902	0.182643
203.034	dhna	1,4-Dihydroxy-2-naphthoate	0.89209	0.118649
176.936	ppi	Diphosphate	0.892207	0.17812
321.114	ptcys	N-Pantothenoylcysteine	0.892388	0.03741
323.028	psd5p;ump	Pseudouridine 5'-phosphate;UMP	0.896577	0.011345
690.508	pe160	phosphatidylethanolamine (dihexadecanoyl, n-C16:0)	0.897117	0.834016
594.318	palmACP	Palmitoyl-ACP (n-C16:0ACP)	0.897913	0.311648
339.327	dmarach	di-methyl arachic acid	0.899005	0.199203
251.129	qh2	Ubiquinol	0.900951	0.037134
857.558	decdp;decdp_tb	all trans Decaprenyl diphosphate;(E,E,E,E,E,E,E,Z,Z) Decaprenyl diphosphate	0.901936	0.708341
89.0242	lac-L	L-Lactate	0.902975	0.266132
253.015	skm5p	Shikimate 5-phosphate	0.90368	0.086456
266.068	rhcys	S-Ribosyl-L-homocysteine	0.903684	0.083437
131.045	asn-L	L-Asparagine	0.903943	0.037701
230.067	sucgsa	N2-Succinyl-L-glutamate 5-semialdehyde	0.905074	0.313649
96.9598	so4	Sulfate	0.905576	0.274016
218.033	4ampm	4-Amino-2-methyl-5-phosphomethylpyrimidine	0.908818	0.519601
172.061	acg5sa	N-Acetyl-L-glutamate 5-semialdehyde	0.909091	0.023698
479.483	tamocta	tetra-methyl octacosanoate	0.911734	0.649879
177.041	3ddgc	3-Dehydro-2-deoxy-D-gluconate	0.912415	0.171704
720.312	cmcbtt	carboxymycobactin T (R=8 carbon, final carbon is carboxyl group)	0.912761	0.469202
442.144	dhf	7,8-Dihydrofolate	0.913664	0.238192
895.351	pre6b	Precorrin 6B	0.917161	0.359576
246.017	pydx5p	Pyridoxal 5'-phosphate	0.917996	0.115493
282.084	gsn	Guanosine	0.918915	0.310968
149.046	arab-D;arab-L;rbl-D;rbl-L;rib-D;xyl-D;xylu-D	D-Arabinose;L-Arabinose;D-Ribulose;L-Ribulose;D-Ribose;D-Xylose;D-Xylulose	0.918942	0.5414
375.131	ribflv	Riboflavin	0.919271	0.01057
257.007	6pgl	6-phospho-D-glucono-1,5-lactone	0.919525	0.340089
61.9881	no3	Nitrate	0.920117	0.498689
173.045	3c4mop;skm	3-Carboxy-4-methyl-2-oxopentanoate;Shikimate	0.920644	0.025005
150.041	gua	Guanine	0.920855	0.251775
139.975	cbp	Carbamoyl phosphate	0.922882	0.181517
198.019	phom	O-Phospho-L-homoserine	0.926095	0.497286
112.04	1pyr5c	1-Pyrroline-5-carboxylate	0.92838	0.234153
675.211	bmnmsh	bimane conjugated mycothiol (mtb)	0.929283	0.265705
115.003	fum	Fumarate	0.929496	0.473703
249.055	glucys	gamma-L-Glutamyl-L-cysteine	0.929864	0.367178
220.05	hisp	L-Histidinol phosphate	0.930117	0.474089
183.006	db4p	3,4-dihydroxy-2-butanone 4-phosphate	0.93148	0.422997
140.081	histd	L-Histidinol	0.931816	0.464116
294.049	air	5-amino-1-(5-phospho-D-ribosyl)imidazole	0.933871	0.310614
296.083	5mta	5-Methylthioadenosine	0.935458	0.320872
57.0341	ppal	Propanal	0.93652	0.388237
361.273	phdca	phenol palmitic acid	0.937832	0.523124
134.047	ade	Adenine	0.939011	0.273709
307.034	dump	dUMP	0.940241	0.237703
231.099	sucorn	N2-Succinyl-L-ornithine	0.940805	0.309824
103.04	bhb	(R)-3-Hydroxybutanoate	0.941371	0.417947
287.015	2dda7p	2-Dehydro-3-deoxy-D-arabino-heptonate 7-phosphate	0.941838	0.351664
145.05	2ahbut;2dhp	(S)-2-Aceto-2-hydroxybutanoate;2-Dehydropantoate	0.946197	0.321352
505.989	atp;dgtp	ATP;dGTP	0.946343	0.393544
59.0135	ac;gcald	Acetate;Glycolaldehyde	0.946548	0.312851
102.056	4abut	phosphoserine	0.948879	0.068055
218.067	suchms	O-Succinyl-L-homoserine	0.954821	0.449132
203.083	trp-L	L-Tryptophan	0.955188	0.221259
131.035	4h2opntn;alac-S	4-Hydroxy-2-oxopentanoate;(S)-2-Acetolactate	0.95696	0.611038
297.28	m1ocdca;mocdca	methyl octadecanoate;10-methylstearic acid	0.957066	0.843416
493.992	ahdt	2-Amino-4-hydroxy-6-(erythro-1,2,3-trihydroxypropyl)dihydropteridine triphosphate	0.957303	0.577042
133.014	mal-L	L-Malate	0.959416	0.882341
520.073	4c2me	4-(cytidine 5'-diphospho)-2-C-methyl-D-erythritol	0.962969	0.673085
100.078	betald	Betaine aldehyde	0.963278	0.70256
664.116	nadh	Nicotinamide adenine dinucleotide - reduced	0.963541	0.499901
111.02	ura	Uracil	0.967027	0.379627
268.022	acg5p	N-Acetyl-L-glutamyl 5-phosphate	0.97037	0.598752
121.041	ncam	Nicotinamide	0.974378	0.674692
565.048	udpg;udpgal;udpgalfur	UDPglucose;UDPgalactose;UDP-D-galacto-1,4-furanose	0.97578	0.678217
170.046	thdp	2,3,4,5-Tetrahydrodipicolinate	0.976315	0.707976
243.085	btn	Biotin	0.977023	0.741739
130.051	5aop;glu1sa;glu5sa	5-Amino-4-oxopentanoate;L-Glutamate 1-semialdehyde;L-Glutamate 5-semialdehyde	0.977974	0.764137
166.051	pydx	Pyridoxal	0.979782	0.578237
249.113	q	Ubiquinone	0.980311	0.742905
243.063	uri	Uridine	0.980359	0.636361
662.101	nad	Nicotinamide adenine dinucleotide	0.982452	0.70648
347.04	imp	IMP	0.982493	0.763501
352.069	25dhpp;25drapp	2,5-Diamino-6-hydroxy-4-(5'-phosphoribosylamino)-pyrimidine;2,5-Diamino-6-(ribosylamino)-4-(3H)-pyrimidinone 5'-phosphate	0.986463	0.842182
105.019	glyc-R	(R)-Glycerate	0.986854	0.844156
472.155	10fthf;5fthf	10-Formyltetrahydrofolate;5-Formyltetrahydrofolate	0.987022	0.8538
72.993	glx	Glyoxylate	0.987484	0.92217
129.114	agm	Agmatine	0.9884	0.845034
367.358	dmbhn;ttc	di-methyl behenic acid;tetracosanoate (n-C24:0)	0.988557	0.918948
619.638	omtta	octa-methyl tetracontatricosanoic acid (C34:0, 8 methyl-branched carbons)	0.988758	0.961296
255.233	hdca	Hexadecanoate (n-C16:0)	0.992425	0.903188
547.073	dtdprmn	dTDP-L-rhamnose	0.994047	0.910184
75.0084	glyclt	Glycolate	0.999814	0.997801
263.097	thm	Thiamin	1.00045	0.993194
809.258	harab-D	hexa arabinofuranoside	1.00193	0.976442
334.058	dhpmp	Dihydroneopterin monophosphate	1.00345	0.976569
138.979	actp	Acetyl phosphate	1.00848	0.829917
244.999	dmpp;ipdp	Dimethylallyl diphosphate;Isopentenyl diphosphate	1.00916	0.743707
321.05	dtmp	dTMP	1.01231	0.740646
187.146	dann	7,8-Diaminononanoate	1.01247	0.8567
264.95	13dpg	3-Phospho-D-glyceroyl phosphate	1.01468	0.813735
146.046	acser;glu-D;glu-L	O-Acetyl-L-serine;D-Glutamate;L-Glutamate	1.01586	0.700543
248.034	pdx5p	Pyridoxine 5'-phosphate	1.01606	0.85951
828.513	mcbts	mycobactin S	1.01635	0.924846
600.042	2p4c2me	2-phospho-4-(cytidine 5'-diphospho)-2-C-methyl-D-erythritol	1.01635	0.876363
167.082	pydam	Pyridoxamine	1.01932	0.637262
289.105	sl26da	N-Succinyl-LL-2,6-diaminoheptanedioate	1.0223	0.675015
147.066	23dhmp;pant-R	(R)-2,3-Dihydroxy-3-methylpentanoate;(R)-Pantoate	1.0294	0.714216
175.036	cbasp	N-Carbamoyl-L-aspartate	1.02996	0.874991
456.161	mlthf	5,10-Methylenetetrahydrofolate	1.03018	0.595467
575.432	prepphth	phenolic phthiocerol precursor	1.03153	0.957249
482.961	utp	UTP	1.03378	0.611393
128.035	5oxpro;glutrna	5-Oxoproline;L-Glutamyl-tRNA(Glu)	1.03862	0.258399
277.117	rdmbzi	N1-(alpha-D-ribosyl)-5,6-dimethylbenzimidazole	1.04376	0.320571
334.038	nicrnt	Nicotinate D-ribonucleotide	1.04413	0.502379
173.104	arg-L	L-Arginine	1.04558	0.301701
313.044	fgam	N2-Formyl-N1-(5-phospho-D-ribosyl)glycinamide	1.04907	0.315217
742.068	nadp	Nicotinamide adenine dinucleotide phosphate	1.04915	0.436746
258.039	gam1p;gam6p	D-Glucosamine 1-phosphate;D-Glucosamine 6-phosphate	1.0556	0.60195
715.545	mqn8	Menaquinone 8	1.05597	0.842181
171.03	3dhsk	3-Dehydroshikimate	1.05803	0.388179
281.249	ocdcea	octadecenoate (n-C18:1)	1.06048	0.709951
423.031	thmpp	Thiamine diphosphate	1.06068	0.046829
227.069	duri	Deoxyuridine	1.06119	0.27101
827.33	focytc	Ferrocytochrome c	1.06126	0.623912
377.34	codhpre6	cobalt-dihydro-precorrin 6	1.0623	0.660366
494.642	adocbi	Adenosyl cobinamide	1.06373	0.520075
74.0238	gly	Glycine	1.06724	0.395358
388.944	arpp;prpp	5-phosphoarabinose pyrophosphate;5-Phospho-alpha-D-ribose 1-diphosphate	1.06785	0.261372
402.011	cdp	CDP	1.06936	0.226554
259.023	f6p;g1p;g6p;gal1p;man1p;man6p;mi1p-D;mi3p-D;mi4p-D	D-Fructose 6-phosphate;D-Glucose 1-phosphate;D-Glucose 6-phosphate;alpha-D-Galactose 1-phosphate;D-Mannose 1-phosphate;D-Mannose 6-phosphate;1D-myo-Inositol 1-phosphate;1D-myo-Inositol 3-phosphate;1D-myo-Inositol 4-phosphate	1.0696	0.309294
668.145	enter	Enterochelin	1.0699	0.24501
171.139	dca	Decanoate (n-C10:0)	1.07852	0.334692
686.138	dpcoa	Dephospho-CoA	1.08318	0.321466
276.988	2mecdp	2-C-methyl-D-erythritol 2,4-cyclodiphosphate	1.087	0.236516
173.093	acorn	N2-Acetyl-L-ornithine	1.08835	0.174149
213.126	dtbt	Dethiobiotin	1.09205	0.301049
119.05	pacald	Phenylacetaldehyde	1.09424	0.201258
859.257	sheme	Siroheme	1.09799	0.542755
187.04	phthcl	phthiocol (oxidized)	1.10069	0.147383
969.28	mssg	mycothiol (oxidized - dimer)	1.10905	0.119637
289.033	s7p	Sedoheptulose 7-phosphate	1.1121	0.336492
164.072	phe-L	L-Phenylalanine	1.11283	0.097013
442.017	gdp	GDP	1.11723	0.034329
563.068	dtdpglu	dTDPglucose	1.11747	0.006524
306.081	sdhlam	S-Succinyldihydrolipoamide	1.12445	0.067577
717.561	mql8	Menaquinol 8	1.12607	0.610563
184.002	pser-L	O-Phospho-L-serine	1.12769	0.00662
744.082	nadph	Nicotinamide adenine dinucleotide phosphate - reduced	1.12832	0.311834
114.056	pro-L	L-Proline	1.13176	0.002391
212.981	ohpb	2-Oxo-3-hydroxy-4-phosphobutanoate	1.13929	0.19515
784.15	fad	Flavin adenine dinucleotide oxidized	1.14112	0.014074
845.657	udcpp	Undecaprenyl phosphate	1.1461	0.473579
217.083	gluala	5-L-Glutamyl-L-alanine	1.14623	0.000485
878.169	uamag	UDP-N-acetylmuramoyl-L-alanyl-D-glutamate	1.14864	0.237689
477.509	adcobdam	Adenosyl cobyrinate diamide	1.14885	0.630523
130.087	ile-L;leu-L	L-Isoleucine;L-Leucine	1.14907	0.00478
253.217	hdcea	Hexadecenoate (n-C16:1)	1.15076	0.430355
218.103	pnto-R	(R)-Pantothenate	1.15289	0.186396
452.277	2agpe160	2-Acyl-sn-glycero-3-phosphoethanolamine (n-C16:0)	1.1537	0.310104
799.653	agdpcbi	Adenosine-GDP-cobinamide	1.15519	0.409562
159.077	alaala	D-Alanyl-D-alanine	1.15718	0.041042
220.083	acgam	N-Acetyl-D-glucosamine	1.15749	0.025378
104.035	ser-D;ser-L	D-Serine;L-Serine	1.1586	0.036167
746.569	pe180	phosphatidylethanolamine (dioctadecanoyl, n-C18:0)	1.16095	0.626246
151.026	xan	Xanthine	1.16692	0.566833
851.566	ptd1ino160190	phosphatidyl 1D myo inositol (C16:0, C19:0)	1.18136	0.428316
852.105	malcoa	Malonyl-CoA	1.18382	0.038642
275.017	6pgc	6-Phospho-D-gluconate	1.19412	0.040578
189.088	26dap-LL;26dap-M	LL-2,6-Diaminoheptanedioate;meso-2,6-Diaminoheptanedioate	1.20596	0.003538
481.976	ctp	CTP	1.21362	2.8e-05
908.166	pmcoa	Pimeloyl-CoA	1.23386	0.051464
763.547	pg160190	Phosphatidylglycerol (hexadecanoyl, methylstearoyl)	1.23498	0.31
805.596	pg190	Phosphatidylglycerol (dimethylstearoyl, C19:0)	1.2577	0.235531
135.031	hxan	Hypoxanthine	1.2752	0.438176
894.171	ugmag	UDP-N-glycolylmuramoyl-L-alanyl-D-glutamate	1.27898	0.003229
227.202	ttdca	tetradecanoate (n-C14:0)	1.28866	0.088023
267.073	ins	Inosine	1.29919	1.7e-05
678.096	uamr	UDP-N-acetylmuramate	1.3046	0.016397
717.278	fcmcbtt	iron(III) chelated carboxymycobactin T (R=8 carbon, final carbon is carboxyl group)	1.31345	0.001477
442.079	malACP	Malonyl-[acyl-carrier protein]	1.31363	0.000195
827.265	maltpt	Maltopentaose	1.33493	0.001302
283.071	xtsn	Xanthosine	1.34157	0.005774
521.983	gtp	GTP	1.35379	3.2e-05
586.055	gdpddman	GDP-4-dehydro-6-deoxy-D-mannose	1.36052	0.000657
214.049	g3pe	sn-Glycero-3-phosphoethanolamine	1.36408	4e-06
721.507	pg160	Phosphatidylglycerol (dihexadecanoyl, n-C16:0)	1.37814	0.409424
174.088	citr-L	L-Citrulline	1.39414	0
179.056	2dglcn;gal;glc-D;inost;man	2-Deoxy-D-gluconate;D-Galactose;D-Glucose;myo-Inositol;D-Mannose	1.39528	3e-05
145.098	lys-L	L-Lysine	1.39967	1e-06
206.065	dhlam	Dihydrolipoamide	1.42313	0.00268
229.012	r1p;r5p;ru5p-D;ru5p-L;xu5p-D	alpha-D-Ribose 1-phosphate;alpha-D-Ribose 5-phosphate;D-Ribulose 5-phosphate;L-Ribulose 5-phosphate;D-Xylulose 5-phosphate	1.43585	0.000482
228.028	pram	5-Phospho-beta-D-ribosylamine	1.44587	0.000357
383.115	ahcys	S-Adenosyl-L-homocysteine	1.44842	3e-06
604.07	gdpmann	GDP-D-mannose	1.47505	7e-06
88.0402	ala-B;ala-D;ala-L	beta-Alanine;D-Alanine;L-Alanine	1.47514	1e-06
131.082	orn	Ornithine	1.47904	0
154.062	his-L	L-Histidine	1.48359	7e-06
567.496	12dgr160	1,2-Diacyl-sn-glycerol (dihexadecanoyl, n-C16:0)	1.50908	0.30928
118.051	hom-L;thr-L	L-Homoserine;L-Threonine	1.51048	2e-06
180.067	tyr-L	L-Tyrosine	1.55007	0.000214
952.505	cdpdhdecg	CDP-1,2-dihexadecanoylglycerol	1.5704	0.003272
199.17	ddca	Dodecanoate (n-C12:0)	1.58006	0.037083
606.075	uacgam	UDP-N-acetyl-D-glucosamine	1.64714	0
338.988	fdp	D-Fructose 1,6-bisphosphate	1.65326	7e-06
145.062	gln-L	L-Glutamine	1.67647	1e-06
462.068	dcamp	N6-(1,2-Dicarboxyethyl)-AMP	1.69544	8.1e-05
328.045	camp	cAMP	1.7601	0.000451
588.075	adpglc;gdpfuc	ADPglucose;GDP-L-fucose	1.78694	5e-05
395.39	dmlgnc;hexc	dimethyl lignoceric acid;hexacosanoate (n-C26:0)	1.82358	0.005567
171.006	glyc3p	Glycerol 3-phosphate	1.838	3.6e-05
300.049	acgam1p;acgam6p	N-Acetyl-D-glucosamine 1-phosphate;N-Acetyl-D-glucosamine 6-phosphate	1.84256	0
132.03	asp-L	L-Aspartate	1.86851	2e-06
160.062	achms	O-Acetyl-L-homoserine	1.89708	0.002655
808.118	accoa	Acetyl-CoA	1.93015	0
382.135	iacgam	1D-myo-inositol 2-Acetamido-2-deoxy-D-glucopyranoside	1.93207	5.3e-05
341.11	lcts;malt;tre	Lactose;Maltose;Trehalose	1.9987	0
195.051	glcn	D-Gluconate	2.26032	8.6e-05
116.071	glyb;val-L	Glycine betaine;L-Valine	2.28714	4e-06
340.125	igam	1D-myo-inositol 2-deoxy-D-glucopyranoside	2.56901	1e-06
866.122	mmcoa-R;mmcoa-S;succoa	(R)-Methylmalonyl-CoA;(S)-Methylmalonyl-CoA;Succinyl-CoA	3.47712	1e-06
822.134	ppcoa	Propanoyl-CoA	4.94232	1e-06
205.036	mcit	Methylcitrate	8.06683	7e-06
57.9753	tcynt	Thiocyanate	20.2608	0.275866
